# Supplementary material
Source: PubMed Central journal article supplement (PMC2764084)
Supplement: mmc1.pdf [file mmc1.pdf]

Biophysical Journal, Volume 97

**Supporting Material**

**New insights into the stratum corneum lipid organization by x-ray diffraction analysis**

Daniel Groen, Gert S Gooris, and Joke A Bouwstra

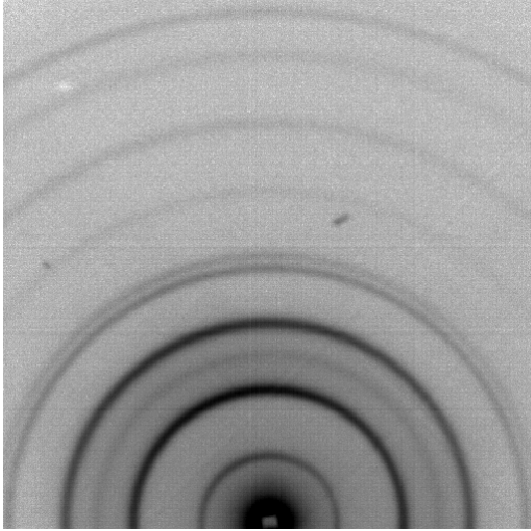

**Figure 1S** The ring-shaped diffraction pattern of a lipid mixture with PigCER:CHOL:FFA in a 2:1:1 molar ratio (see Table 1)
